# Supplementary figures and images for: Pacific Southern Ocean coccolithophore-derived particulate inorganic carbon (PIC): A novel comparative analysis of in-situ and satellite-derived measurements
Source: Copernicus journal article supplement (doi:10.5194/egusphere-2023-2801), 2023-12-20

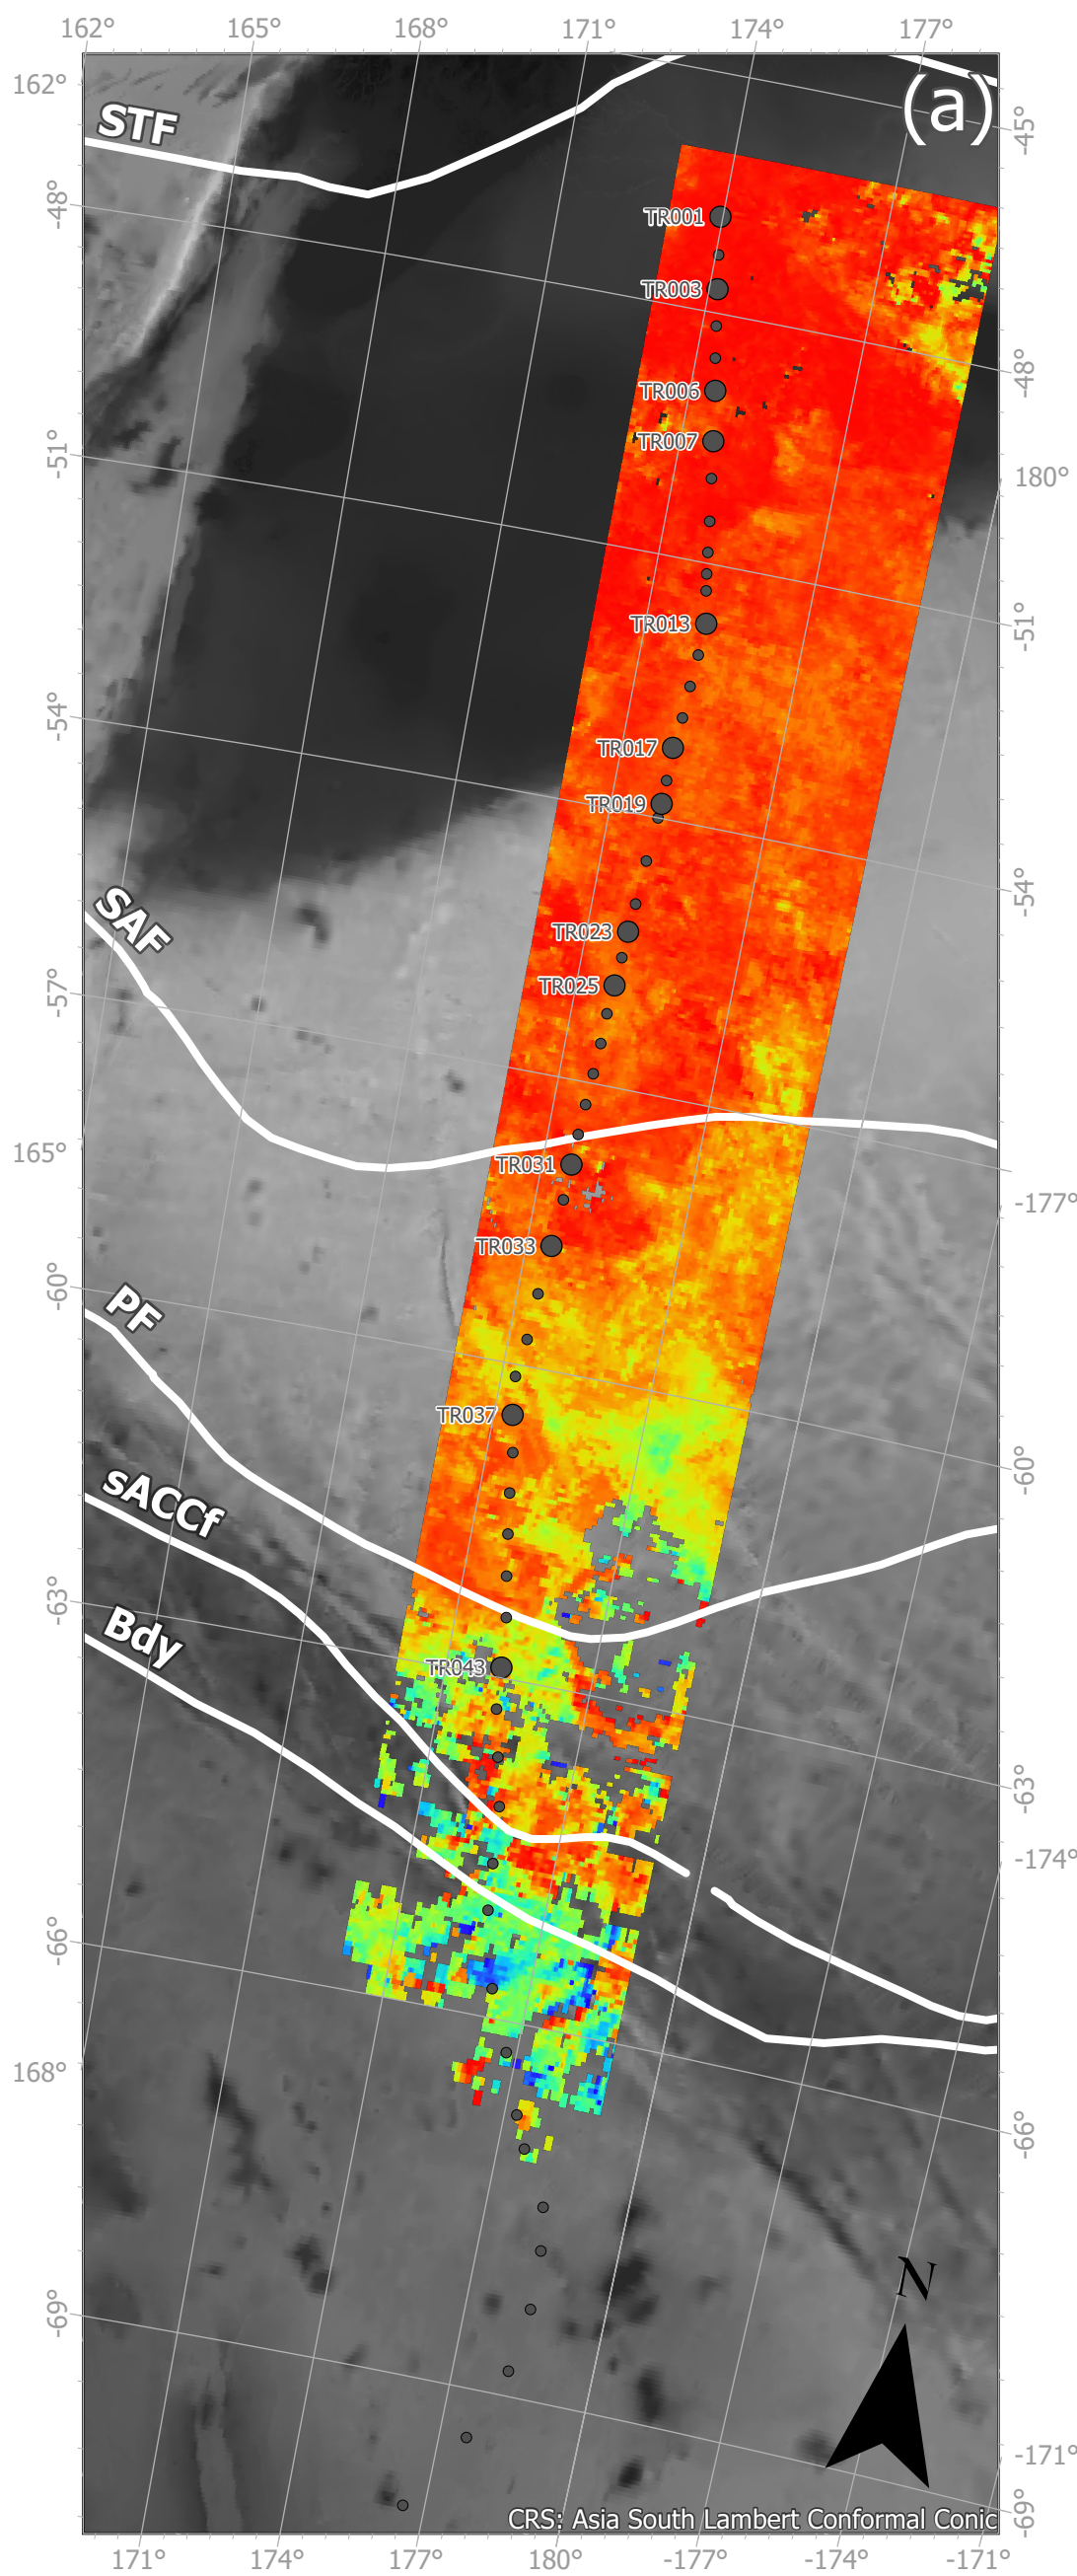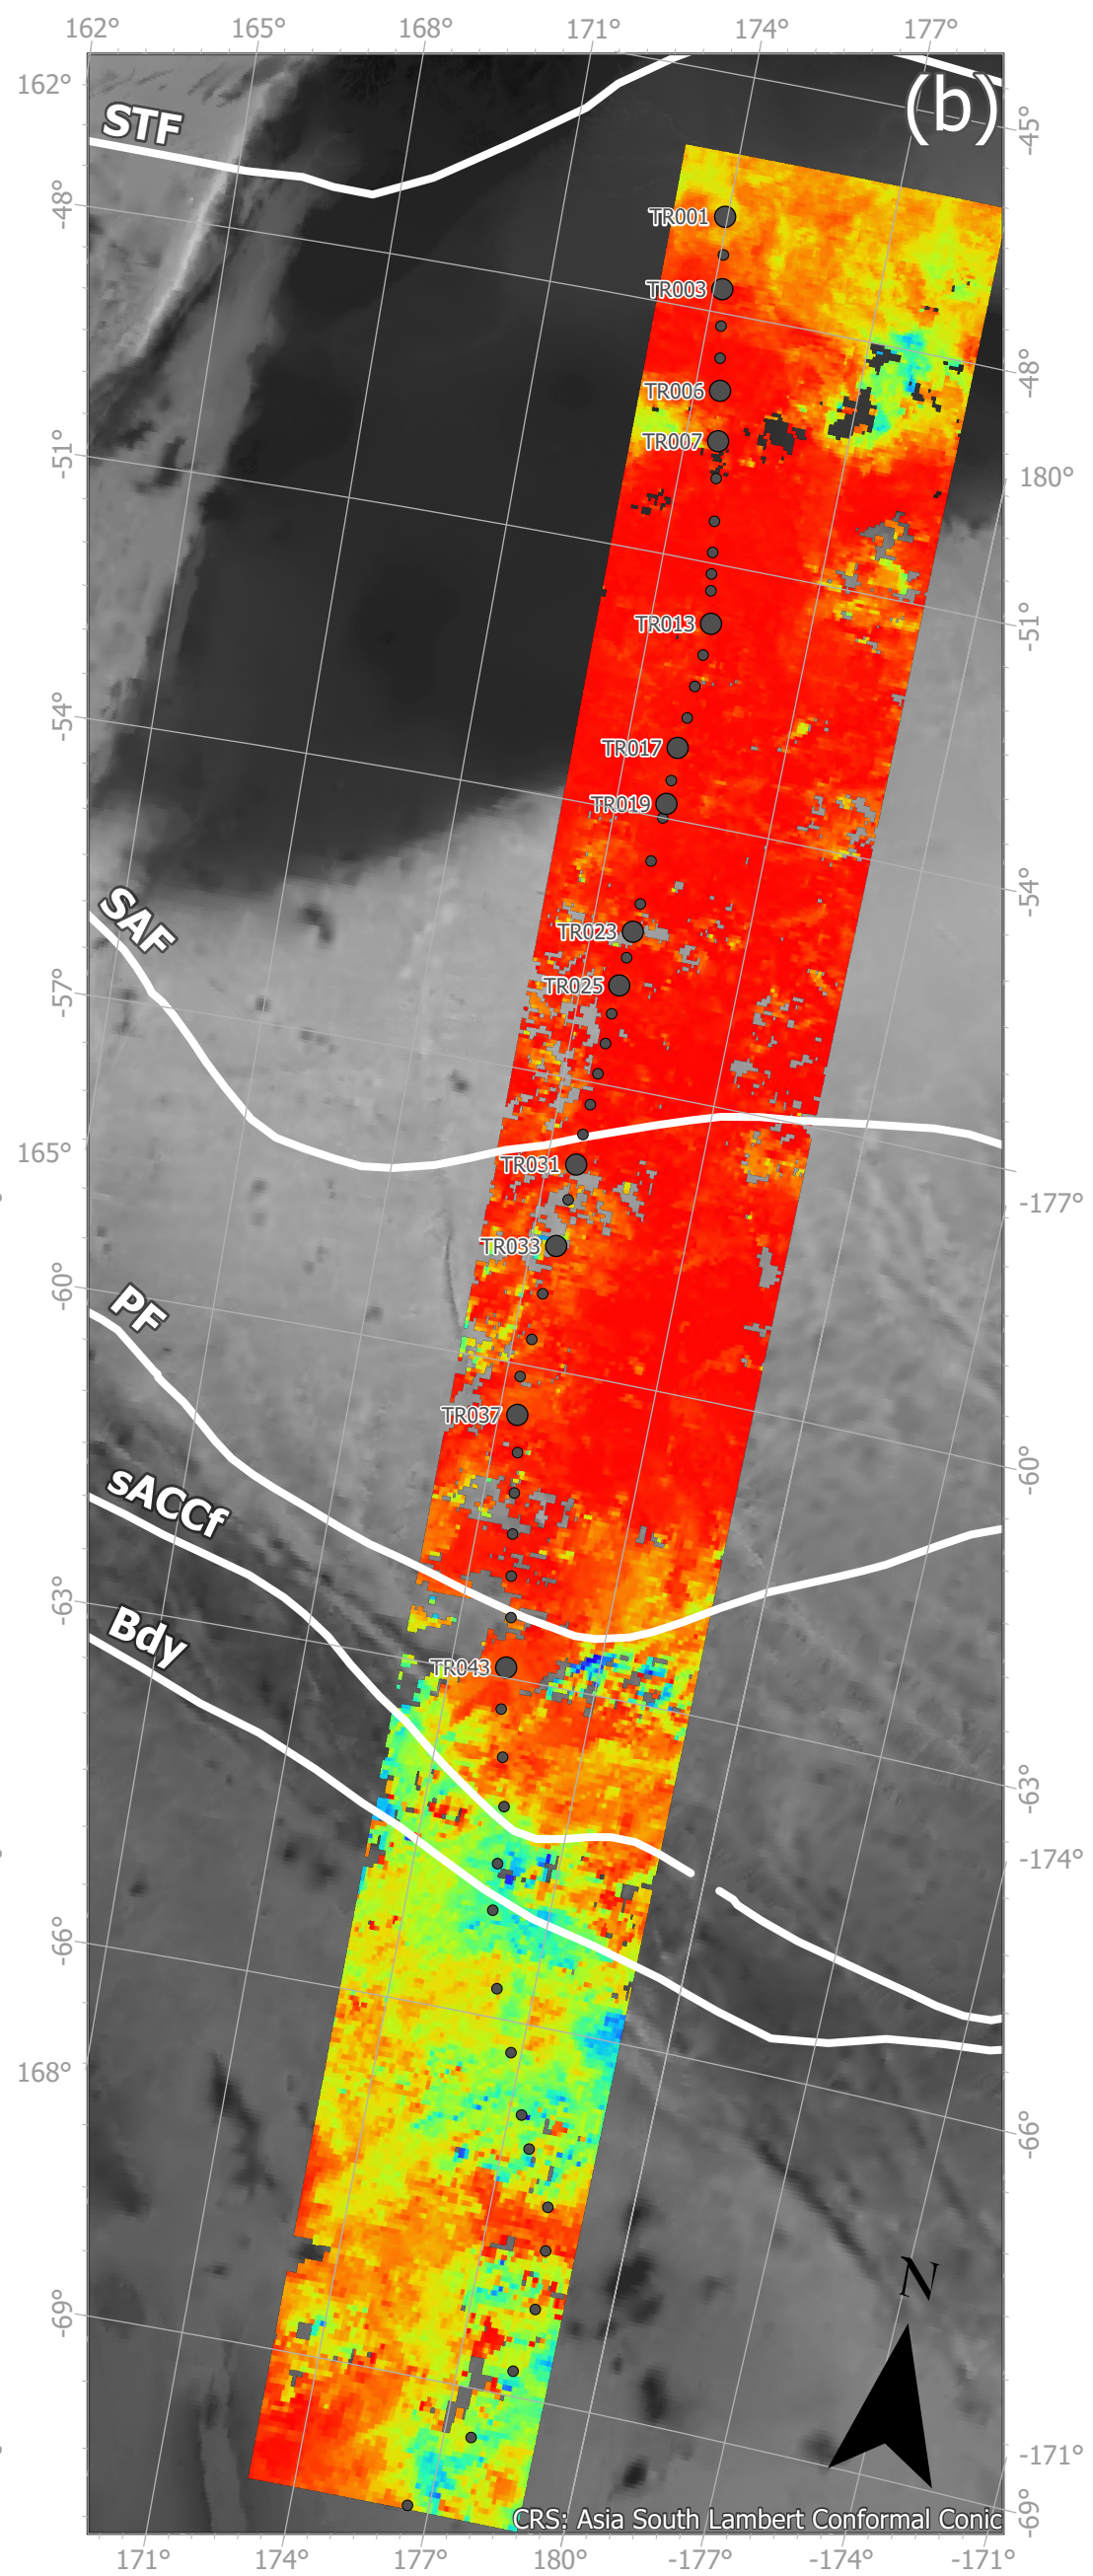

Monthly PIC (mol m<sup>-3</sup>)

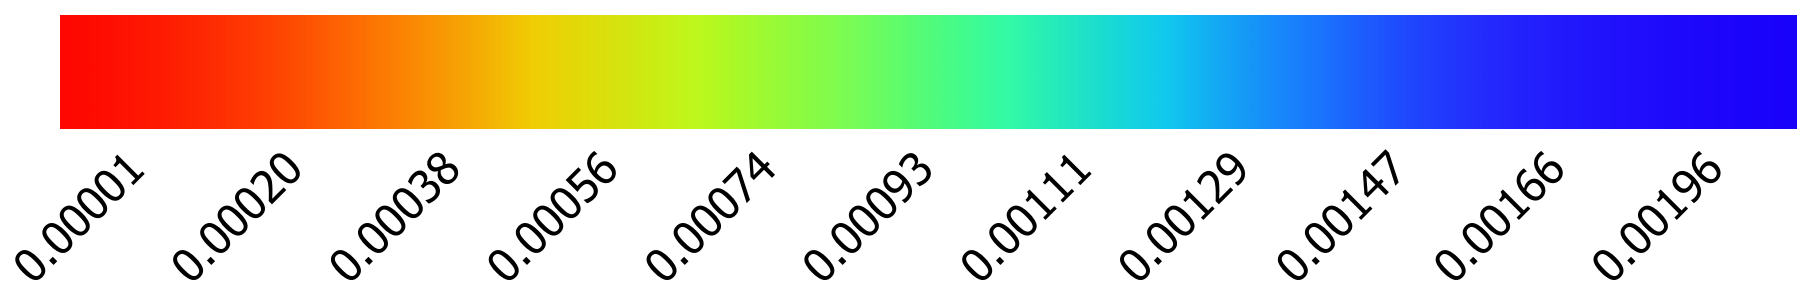

Supplement: Supplementary file 2 [file egusphere-2023-2801-supplement.zip]

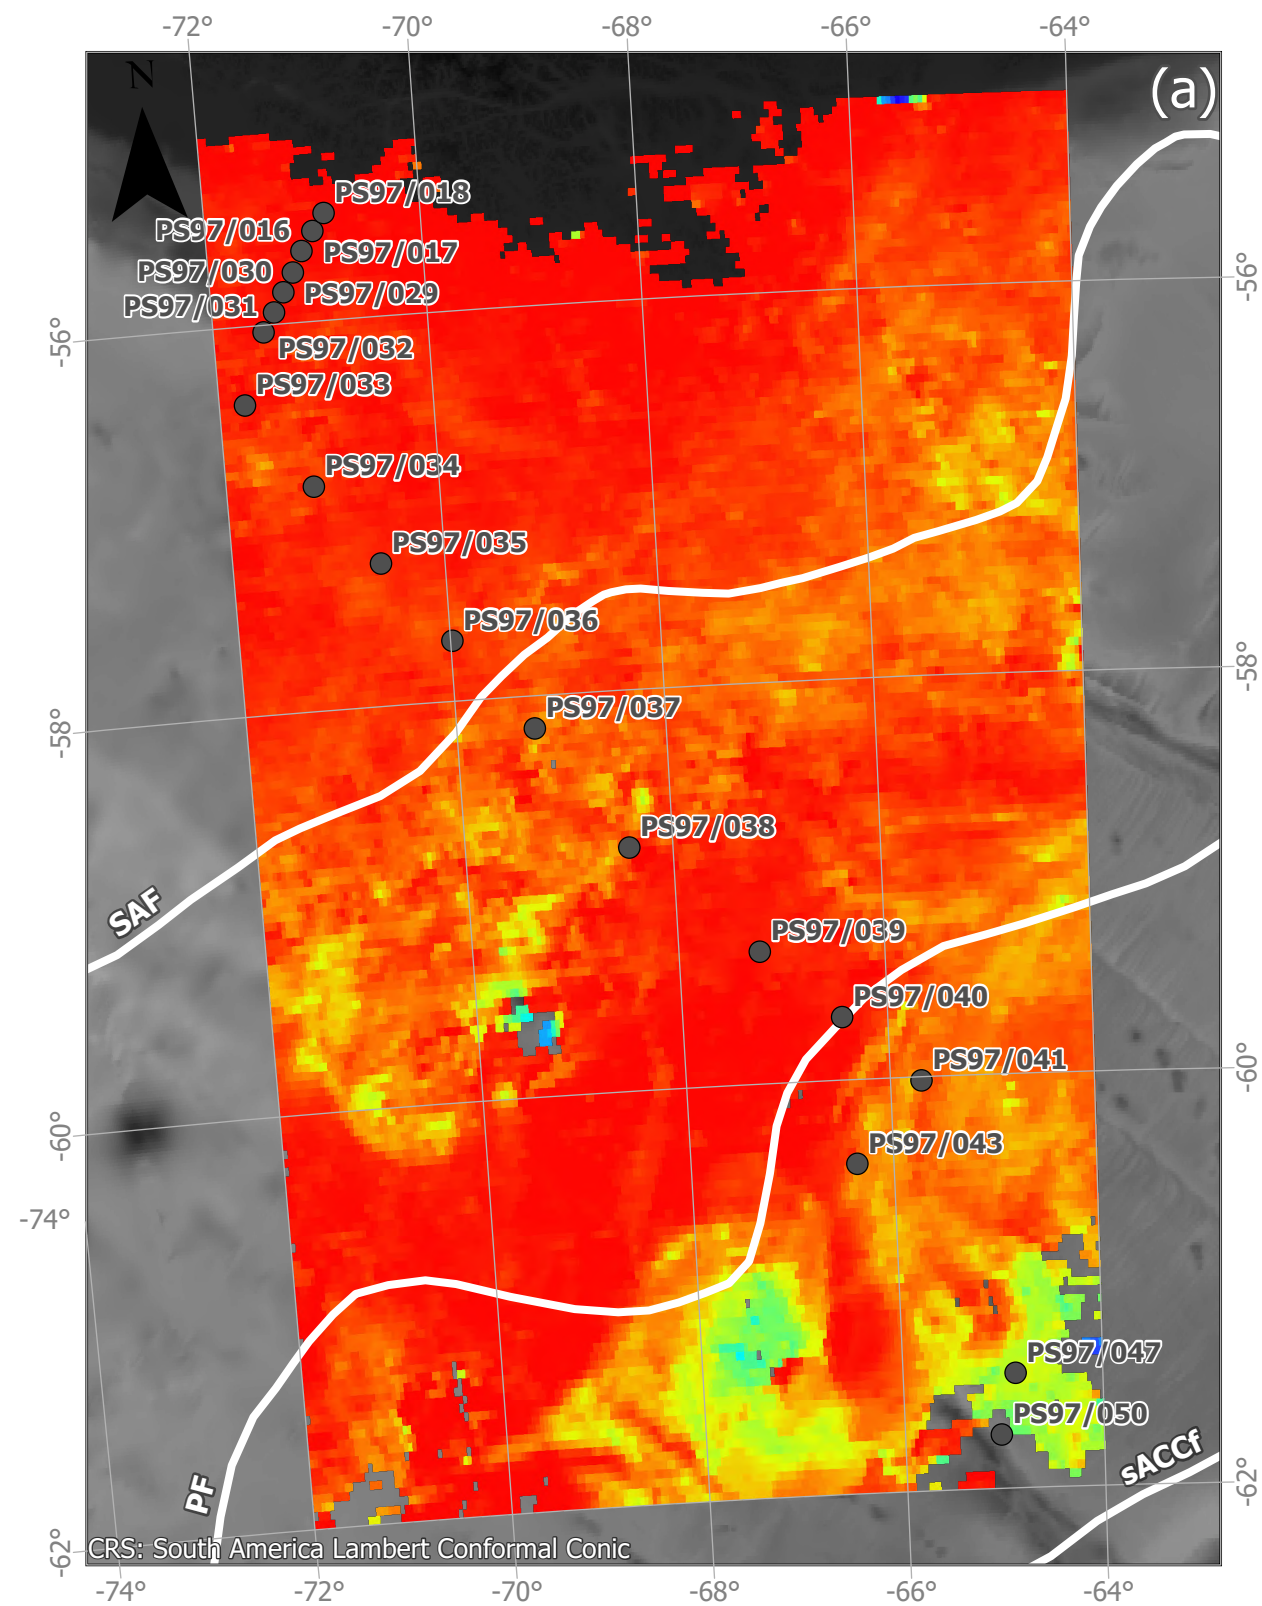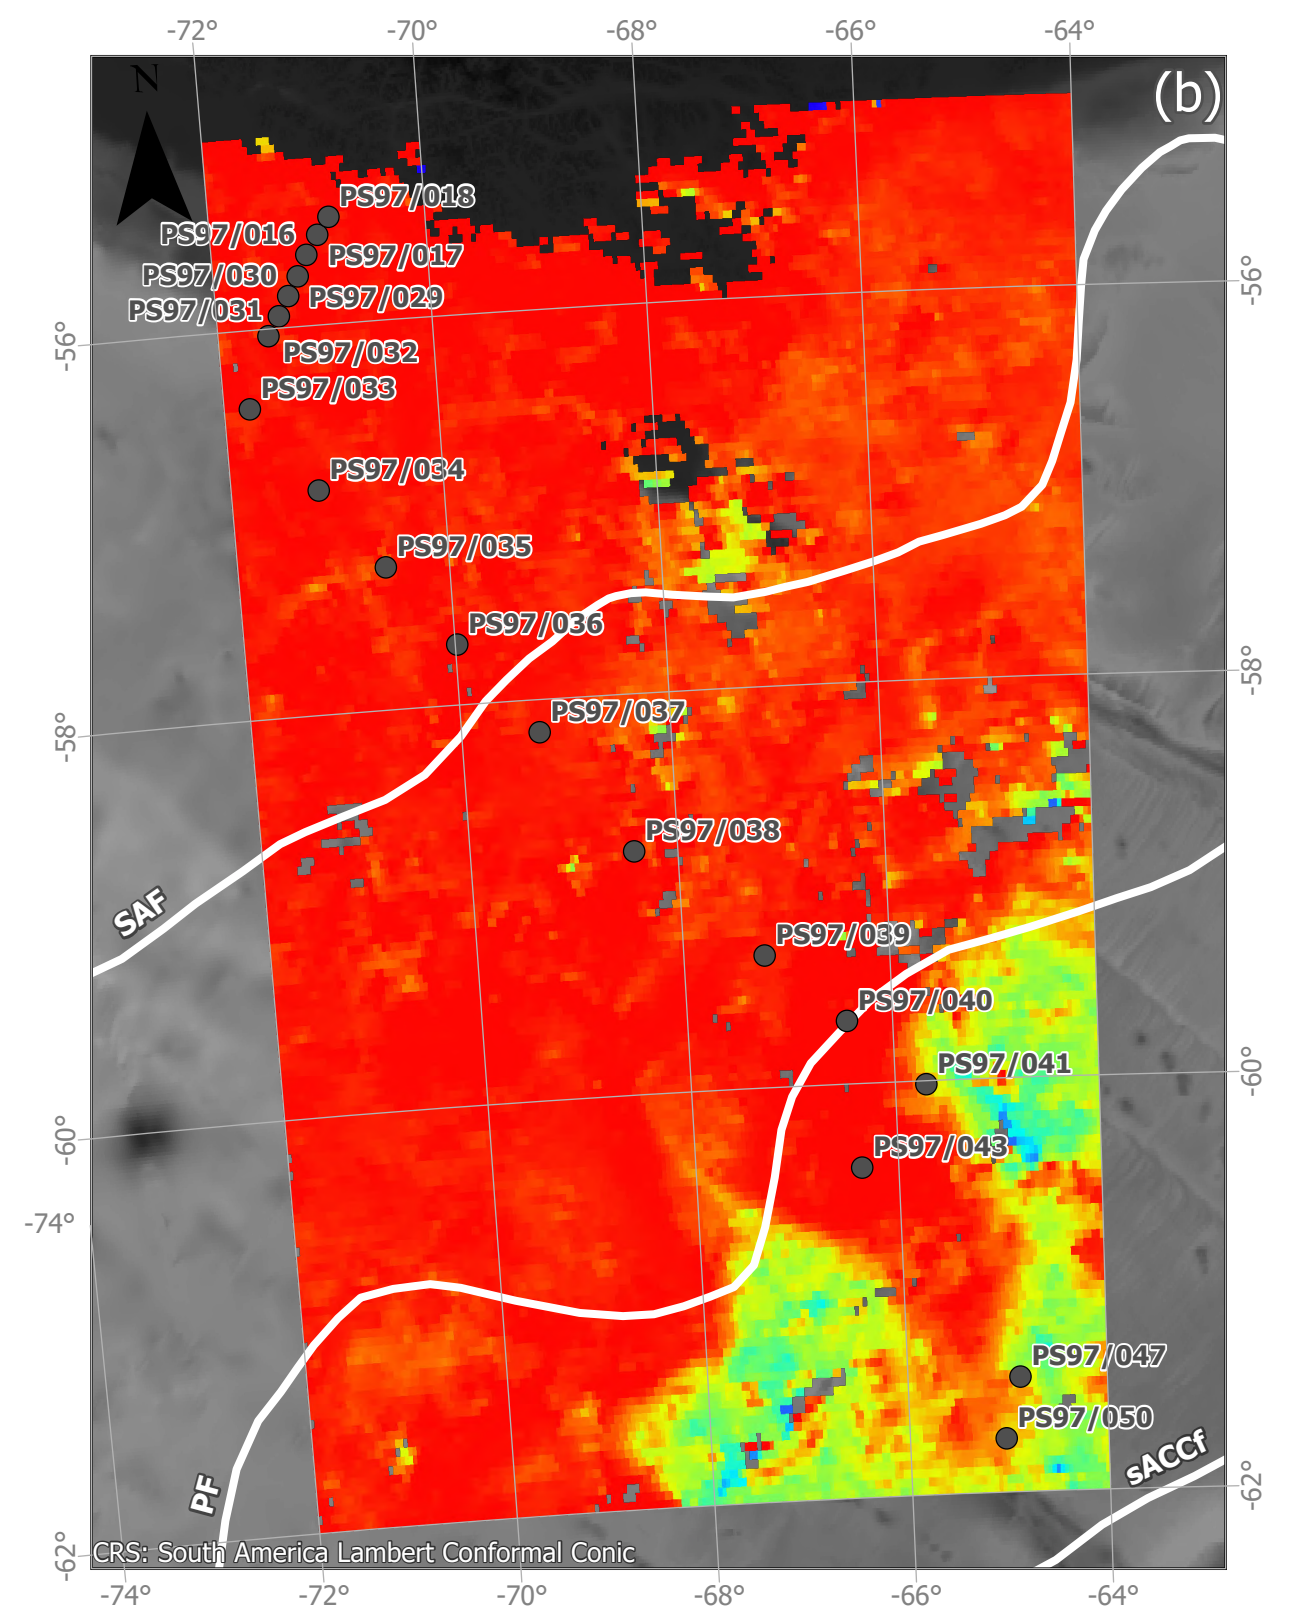

Monthly PIC (mol m<sup>-3</sup>)

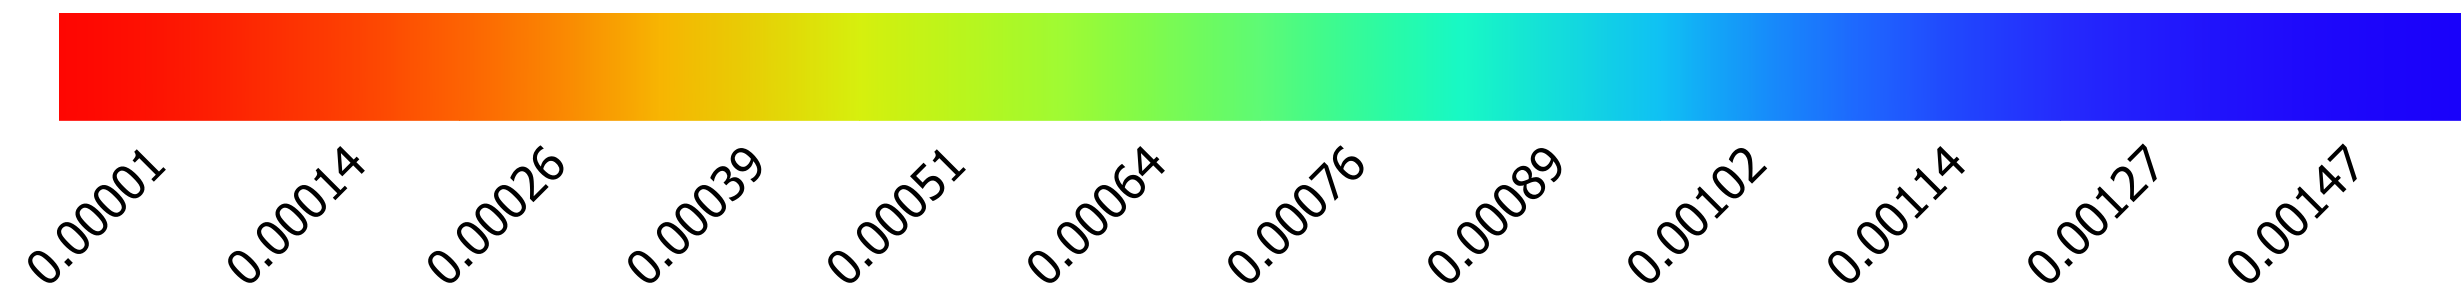

Supplement: Supplementary file 3 [file egusphere-2023-2801-supplement.zip]
